# Supplementary material
Source: PubMed Central journal article supplement (PMC9340011)
Supplement: jmedgenet-2020-107652supp003.pdf [file jmedgenet-2020-107652supp003.pdf]

|                                                               | Benign                                                 |                                                                                                                                                                                                                                                                                     | Pathogenic                                                                                                                                                                                                                                       |                                                                                                                                                                                                                                                                                                                                                                                                                                                                                                                                                   |                                                                                                                                                                                                                                                                                                                                                                                                                                                                                                                                                                                                                                                         |                                                                                                                                                                                                                                                                                                                                                                                                                                                                                                                                                                                                                                       |
|---------------------------------------------------------------|--------------------------------------------------------|-------------------------------------------------------------------------------------------------------------------------------------------------------------------------------------------------------------------------------------------------------------------------------------|--------------------------------------------------------------------------------------------------------------------------------------------------------------------------------------------------------------------------------------------------|---------------------------------------------------------------------------------------------------------------------------------------------------------------------------------------------------------------------------------------------------------------------------------------------------------------------------------------------------------------------------------------------------------------------------------------------------------------------------------------------------------------------------------------------------|---------------------------------------------------------------------------------------------------------------------------------------------------------------------------------------------------------------------------------------------------------------------------------------------------------------------------------------------------------------------------------------------------------------------------------------------------------------------------------------------------------------------------------------------------------------------------------------------------------------------------------------------------------|---------------------------------------------------------------------------------------------------------------------------------------------------------------------------------------------------------------------------------------------------------------------------------------------------------------------------------------------------------------------------------------------------------------------------------------------------------------------------------------------------------------------------------------------------------------------------------------------------------------------------------------|
|                                                               | Strong                                                 | Supporting                                                                                                                                                                                                                                                                          | Supporting                                                                                                                                                                                                                                       | Moderate                                                                                                                                                                                                                                                                                                                                                                                                                                                                                                                                          | Strong                                                                                                                                                                                                                                                                                                                                                                                                                                                                                                                                                                                                                                                  | Very Strong                                                                                                                                                                                                                                                                                                                                                                                                                                                                                                                                                                                                                           |
| <b>Population data</b>                                        | >1% in population databases (gnomAD, ESP) <sup>1</sup> |                                                                                                                                                                                                                                                                                     |                                                                                                                                                                                                                                                  | Absent in population databases (gnomAD, ESP)                                                                                                                                                                                                                                                                                                                                                                                                                                                                                                      | Absent in population databases and increased prevalence in affecteds                                                                                                                                                                                                                                                                                                                                                                                                                                                                                                                                                                                    |                                                                                                                                                                                                                                                                                                                                                                                                                                                                                                                                                                                                                                       |
| <b>Computational and Predictive data (in silico analysis)</b> |                                                        | Multiple lines of computational evidences suggesting no deleterious impact on gene/gene product <sup>2</sup><br>- missense with non predicted impact on gene/gene product<br>- silent or splice site or intronic variant with non predicted splice impact                           | Multiple lines of computational evidences supporting a deleterious impact on gene/gene product <sup>2</sup><br>- missense with predicted impact on gene/gene product<br>- silent or splice site or intronic variant with predicted splice impact | Novel missense change at an amino acid residue where a different pathogenic missense change has been seen<br>(i.e. c.206G>T, p.Gly69Val known as pathogenic and novel missense c.206G>A, p.Gly69Asp)                                                                                                                                                                                                                                                                                                                                              | Same amino acid change as an established pathogenic variant (i.e. c.39G>T, p.Leu13Phe known as pathogenic and novel missense c.39G>C, p.Leu13Phe)                                                                                                                                                                                                                                                                                                                                                                                                                                                                                                       | Null variants <sup>3</sup> : nonsense, frameshift, canonical splice site, initiation codon, single exon or multi-exon deletion/duplication with open-reading frame disruption                                                                                                                                                                                                                                                                                                                                                                                                                                                         |
| <b>Additional data</b>                                        | In tumor DNA, loss of the allele carrying the variant  | 1) Immunohistochemistry evidence: positive SDHB staining<br>2) No loss of heterozygosity<br>3) cDNA analysis showing no unexpected exon size nor exon skipping (for likely splicing variants)<br>4) Transcriptomic analysis: tumor classification not in SDHx-related cluster (C1A) | Loss of heterozygosity in tumor DNA                                                                                                                                                                                                              | 1) Immunohistochemistry evidence: negative SDHB staining, but without genotyping <sup>4</sup> of all SDHx genes (SDHA, SDHB, SDHC, SDHD)<br>2) SDH enzymatic activity abolished without genotyping <sup>4</sup> of all SDHx genes (SDHA, SDHB, SDHC, SDHD)<br>3) Western blot evidence: no SDHB protein detected but without genotyping <sup>4</sup> of all SDHx genes (SDHA, SDHB, SDHC, SDHD)<br>4) Transcriptomic analysis: tumor classification in C1A cluster but without genotyping <sup>4</sup> of all SDHx genes (SDHA, SDHB, SDHC, SDHD) | 1) Immunohistochemistry evidence: SDHB negative and SDHA positive staining with SDHB, SDHC and SDHD sequencing but without search for SDHx large deletions or duplications<br>2) cDNA analysis : abnormal splicing<br>3) SDH enzymatic activity abolished with SDHx genes sequencing but without search for SDHx large deletions or duplications<br>4) Western blot evidence: no SDHB protein detected with SDHx genes sequencing but without search for SDHx large deletions or duplications<br>5) Transcriptomic analysis: tumor classification in C1A cluster with SDHx genes sequencing but without search for SDHx large deletions or duplications | 1) Immunohistochemistry evidence:<br>- negative SDHB staining with genotyping <sup>4</sup> of all SDHx genes (SDHA, SDHB, SDHC, SDHD)<br>- negative SDHB and positive SDHA staining with genotyping <sup>4</sup> of SDHB, SDHC and SDHD genes<br>2) SDH enzymatic activity abolished with genotyping <sup>4</sup> of all SDHx genes (SDHA, SDHB, SDHC, SDHD)<br>3) Western blot evidence: no SDHB protein detected with genotyping <sup>4</sup> of all SDHx genes (SDHA, SDHB, SDHC, SDHD)<br>4) Transcriptomic analysis: tumor classification in C1A cluster with genotyping <sup>4</sup> of all SDHx genes (SDHA, SDHB, SDHC, SDHD) |
| <b>Segregation data</b>                                       | Non-segregation with disease                           |                                                                                                                                                                                                                                                                                     | Co-segregation with disease in multiple affected family members                                                                                                                                                                                  | Increased segregation data →                                                                                                                                                                                                                                                                                                                                                                                                                                                                                                                      |                                                                                                                                                                                                                                                                                                                                                                                                                                                                                                                                                                                                                                                         |                                                                                                                                                                                                                                                                                                                                                                                                                                                                                                                                                                                                                                       |
| <b>Allelic data</b>                                           |                                                        | Observed in cis/trans with a pathogenic variant                                                                                                                                                                                                                                     |                                                                                                                                                                                                                                                  |                                                                                                                                                                                                                                                                                                                                                                                                                                                                                                                                                   |                                                                                                                                                                                                                                                                                                                                                                                                                                                                                                                                                                                                                                                         |                                                                                                                                                                                                                                                                                                                                                                                                                                                                                                                                                                                                                                       |
| <b>Publication data<sup>5</sup></b>                           | Increased publication data ←                           | Published as benign variant                                                                                                                                                                                                                                                         | Published as pathogenic variant                                                                                                                                                                                                                  | Increased publication data →                                                                                                                                                                                                                                                                                                                                                                                                                                                                                                                      |                                                                                                                                                                                                                                                                                                                                                                                                                                                                                                                                                                                                                                                         |                                                                                                                                                                                                                                                                                                                                                                                                                                                                                                                                                                                                                                       |

<sup>1</sup> Stand-alone evidence of benign impact if >5% in population databases  
<sup>2</sup> Combination of different *in silico* tools (missense: PolyPhen2, SIFT, MutationTaster; splice site: MaxEntScan, NNSplice) and Conservation data (nucleotide: phyloP; amino acid: Orthologs conservation, distance between amino acids: Grantham distance)  
<sup>3</sup> Except variant occurring in the last exon or in the last 50 bps of the penultimate exon. Such variants cannot be interpreted without additional assay  
<sup>4</sup> « Genotyping » includes both sequencing using NGS or Sanger and search for large duplication or deletion and implies that no additional SDHx variant was found  
<sup>5</sup> Well-documented publications (number of cases published, functional data...)

| Variant classification | 1 <sup>st</sup> criterion | 2 <sup>nd</sup> criterion  |
|------------------------|---------------------------|----------------------------|
| Pathogenic             | 1 Very Strong             | ≥1 Strong                  |
|                        |                           | ≥2 Moderate                |
|                        |                           | 1 Moderate + 1 Supporting  |
|                        | ≥2 Strong                 | ≥2 Supporting              |
| Likely Pathogenic      | 1 Strong                  | ≥3 Moderate                |
|                        |                           | 2 Moderate + ≥2 Supporting |
|                        |                           | 1 Moderate + ≥4 Supporting |
|                        | 1 Very Strong             | 1 Moderate                 |
|                        | 1 Strong                  | 1-2 Moderate               |
| Likely Benign          | 1 Strong                  | ≥2 Supporting              |
|                        |                           | ≥3 Moderate                |
|                        | ≥3 Moderate               | ≥2 Supporting              |
|                        | 2 Moderate                | ≥2 Supporting              |
| Benign                 | 1 Moderate                | ≥4 Supporting              |
|                        | 1 Strong                  | 1 Supporting               |
|                        | ≥2 Supporting             | -                          |
|                        | 1 Stand-Alone             | -                          |
|                        | ≥2 Strong                 | -                          |

Supplemental Figure 1: adjusted ACMG criteria and combination used for SDHB variant classification
