# Supplementary material
Source: PubMed Central journal article supplement (PMC9340011)
Supplement: jmedgenet-2020-107652supp004.pdf [file jmedgenet-2020-107652supp004.pdf]

| Variant classification according to the NGSnPPGL recommendations |                                                                                                                                                                                                                                                                                                                                                                          |
|------------------------------------------------------------------|--------------------------------------------------------------------------------------------------------------------------------------------------------------------------------------------------------------------------------------------------------------------------------------------------------------------------------------------------------------------------|
| Pathogenic                                                       | Variant reported in literature with strong evidence of pathogenicity<br>or<br>Null variant with functional evidence for pathogenicity                                                                                                                                                                                                                                    |
| Likely Pathogenic                                                | Null variant with no material available for functional study<br>or<br>Missense variant with $\geq 3$ <i>in silico</i> predictions in favour of pathogenicity and functional study supportive of a damaging effect<br>or<br>Intronic or silent variant with predicted splice impact by <i>in silico</i> analysis and and functional study supportive of a damaging effect |
| VUS                                                              | Insufficient evidence to classify<br>or<br>Contradictory criteria                                                                                                                                                                                                                                                                                                        |
| Likely Benign                                                    | Missense variant with $\geq 3$ <i>in silico</i> predictions in favour of the variant being benign<br>or<br>Intronic or silent variant with no predicted splice impact<br>or<br>Co-occurrence with pathogenic variant<br>or<br>Functional evidence for non-pathogenicity                                                                                                  |
| Benign                                                           | AF>1% in control groups<br>or<br>Presence in control groups with no co-segregation with the disease<br>or<br>AF=0,01-1% and functional evidence for non-pathogenicity                                                                                                                                                                                                    |

**Supplemental Figure 2: Variant classification according to the NGSnPPGL recommendations**
